# Supplementary material for: Comparative Evaluation of U.S. Brand and Generic Intravenous Sodium Ferric Gluconate Complex in Sucrose Injection: Biodistribution after Intravenous Dosing in Rats
Source: MDPI journal article supplement (doi:10.3390/nano8010010), 2017-12-28
Supplement: s1 [file s1]

**Table S1:** ICP-MS Parameters

| ICP Parameters               |                                                             |
|------------------------------|-------------------------------------------------------------|
| RF Power                     | 1600 W                                                      |
| Plasma gas flow rate         | 18.0 L/min.                                                 |
| Auxiliary gas flow rate      | 1.2 L/min.                                                  |
| Nebulizer gas flow rate      | 1.0 L/min.                                                  |
| Spray chamber                | Peltier-cooled (2 °C) baffled quartz cyclonic spray chamber |
| Torch                        | Quartz                                                      |
| Sampler and skimmer cones    | Platinum                                                    |
| Hyper skimmer cones          | Nickel                                                      |
| Mass Spectrometer Parameters |                                                             |
| Resolution                   | 0.7 amu at 10% peak maximum                                 |
| Dwell time                   | 50 ms                                                       |
| Sweeps                       | 20                                                          |
| Readings                     | 1                                                           |
| Replicates                   | 3                                                           |
| Autolens                     | ON                                                          |
| Internal Standard            | In (115 amu)                                                |
| Mode of detection            | KED                                                         |

**Table S2:** Parameters of system suitability

|                             |                             | Day 1   |       | Day 2   |       | Day 3   |       |
|-----------------------------|-----------------------------|---------|-------|---------|-------|---------|-------|
| Parameter                   | Acceptance Criteria (% RSD) | Mean    | % RSD | Mean    | % RSD | Mean    | % RSD |
| Fe (cps)                    | NMT 10 %                    | 82341.5 | 0.36  | 74296.8 | 0.42  | 69909.6 | 0.71  |
| In (Internal Standard, cps) | NMT 10 %                    | 16914.8 | 0.34  | 15309.6 | 0.48  | 14601.8 | 0.70  |
| Ratio (Fe/In)               | NMT 2 %                     | 4.8     | 0.09  | 4.8     | 0.25  | 4.7     | 0.42  |

**Table S3:** Parameters of calibration curve

| Calibration sets | Linear Range (Fe ppb) | Calibrators | Correlation coefficient (r <sup>2</sup> ) | Slope  |
|------------------|-----------------------|-------------|-------------------------------------------|--------|
| 1                | 5-500                 | 6           | 0.9999                                    | 0.0246 |
| 2                | 5-500                 | 6           | 0.9999                                    | 0.0244 |
| 3                | 5-500                 | 6           | 0.9999                                    | 0.0242 |

**Table S4:** Quality Control: Accuracy (%)

| S. No. | 5 ppb | 50 ppb | 200 ppb | 500 ppb |
|--------|-------|--------|---------|---------|
| Day 1  | 93.5  | 96.4   | 98.1    | 97.8    |
| Day 2  | 91.9  | 96.8   | 98.5    | 98.9    |
| Day 3  | 106.6 | 98.6   | 98.4    | 97.0    |

**Table S5:** Quality Control: Precision (% R.S.D.)

| S. No. | 5 ppb | 50 ppb | 200 ppb | 500 ppb |
|--------|-------|--------|---------|---------|
| Day 1  | 4.9   | 0.6    | 0.1     | 0.4     |
| Day 2  | 4.76  | 0.58   | 0.25    | 1.25    |
| Day 3  | 1.03  | 0.31   | 0.42    | 0.95    |
